# Supplementary material
Source: PubMed Central journal article supplement (PMC9482792)

# Supplemental Fig. S1

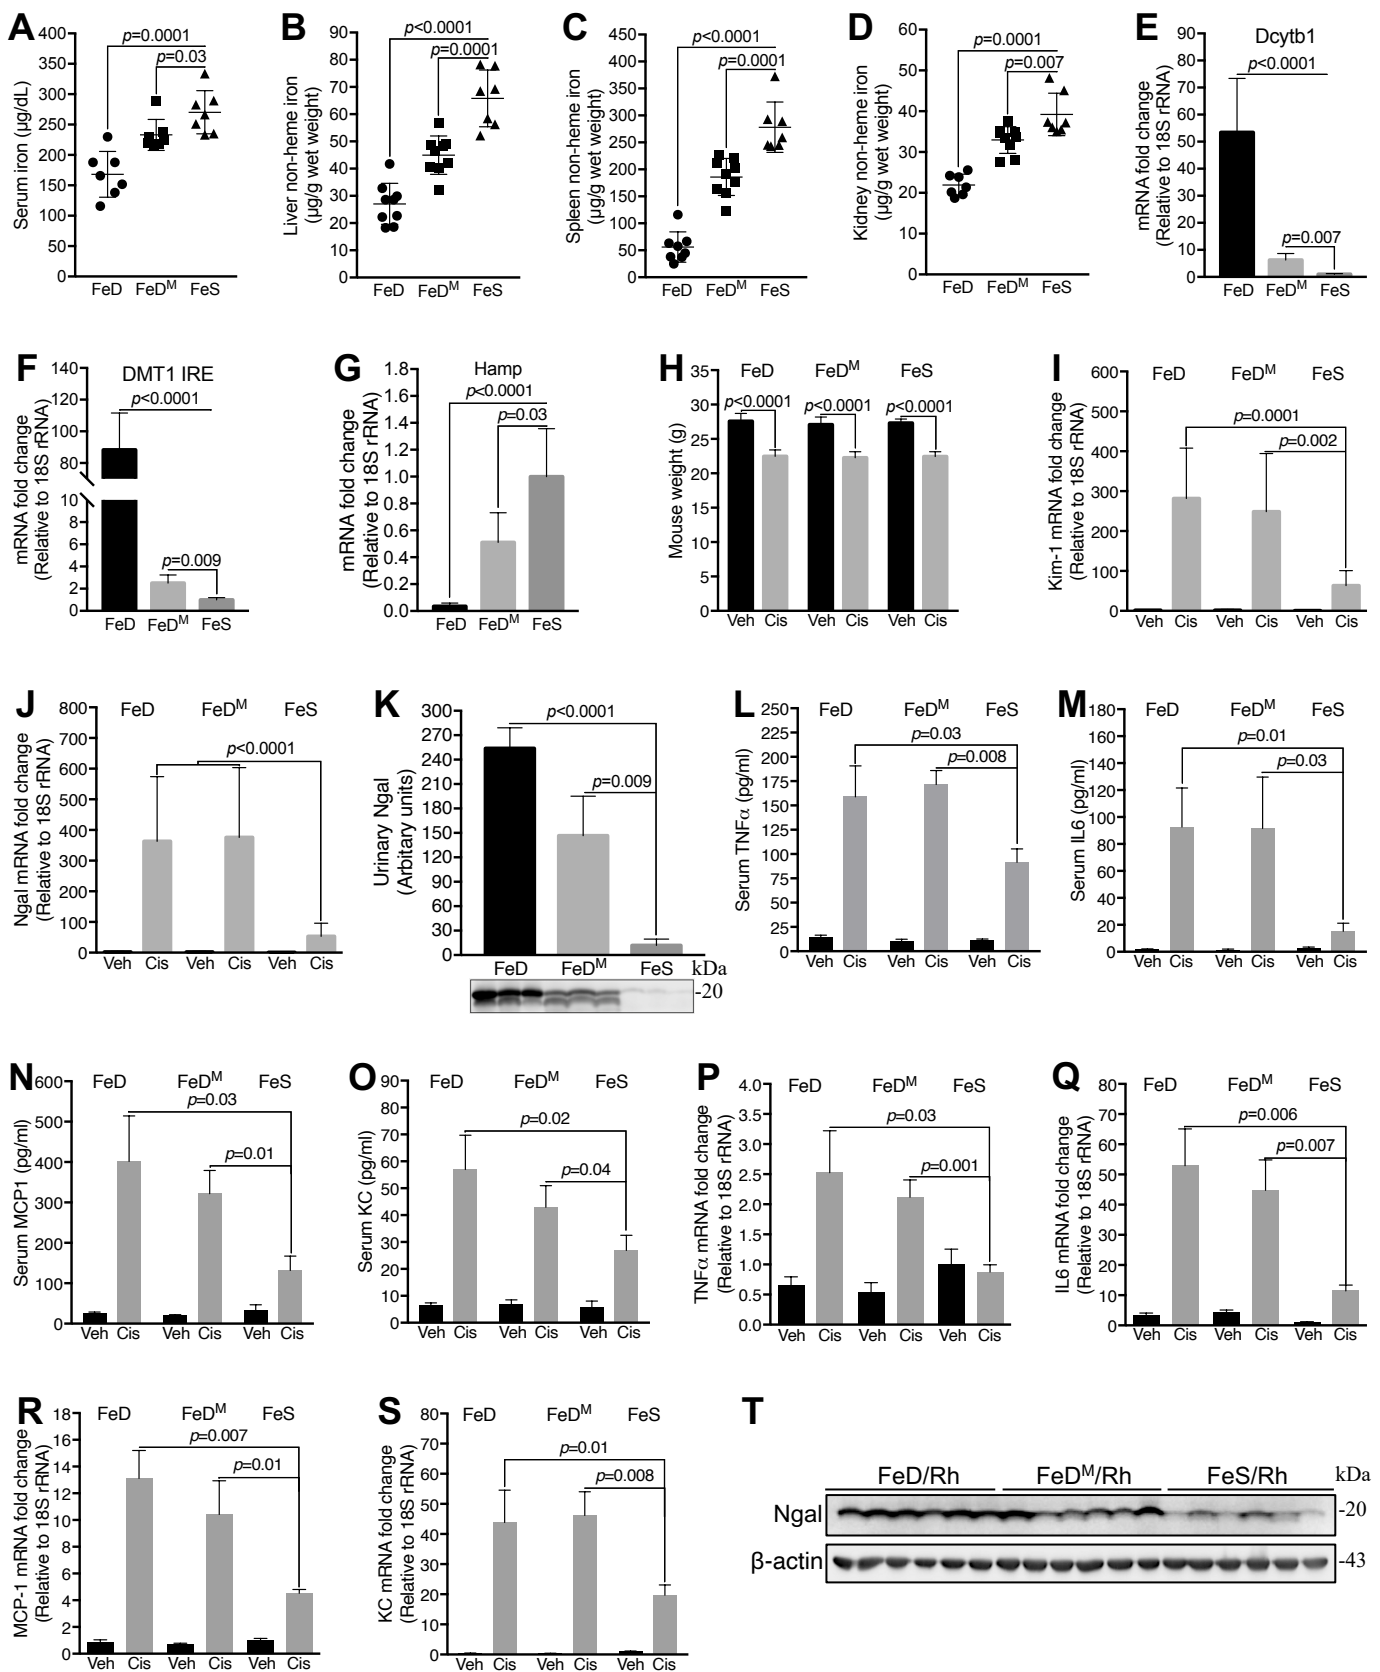

# Supplemental Fig. S2

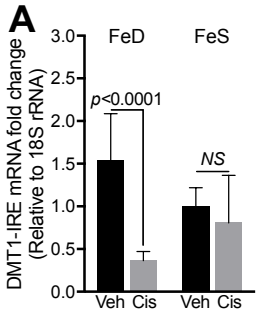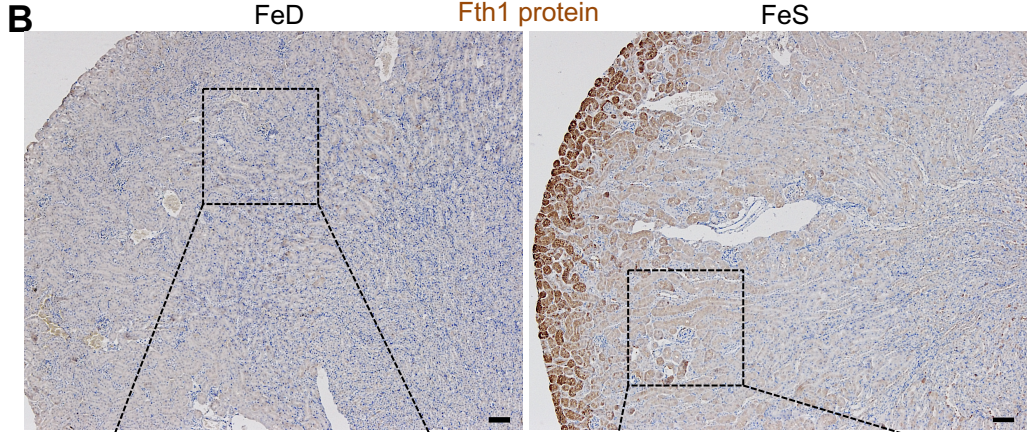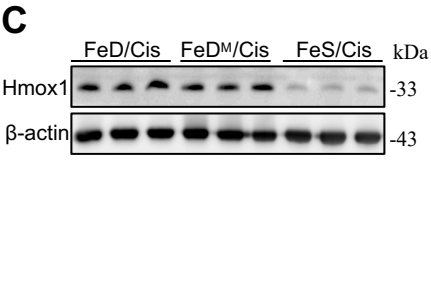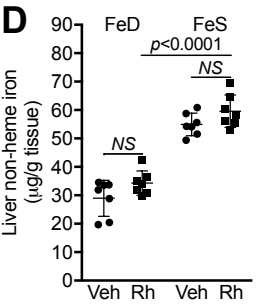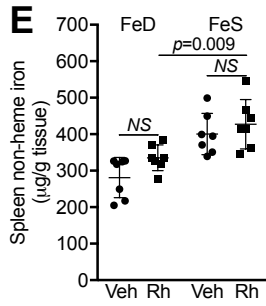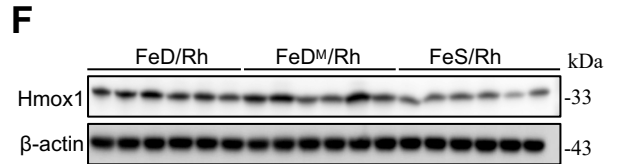

# Supplemental Fig. S3

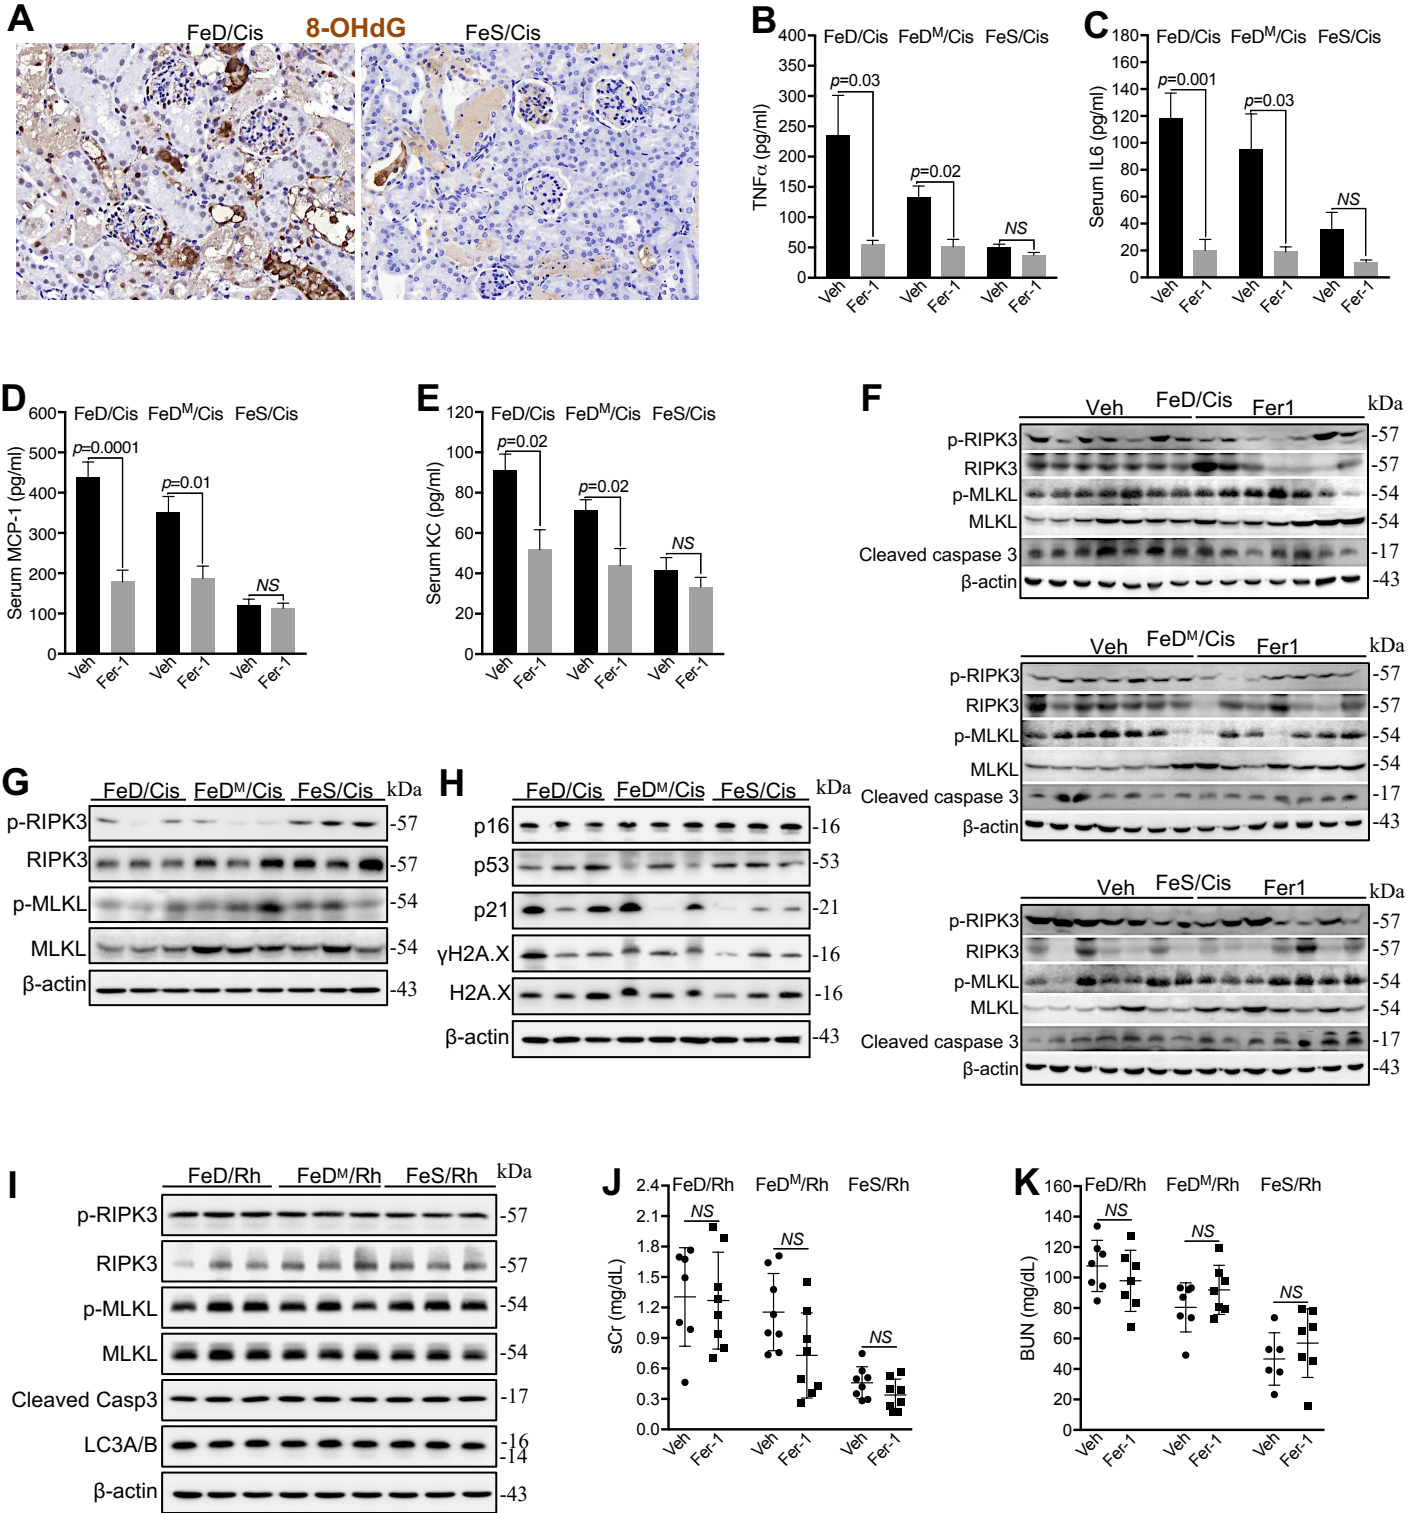

# Supplemental Fig. S4

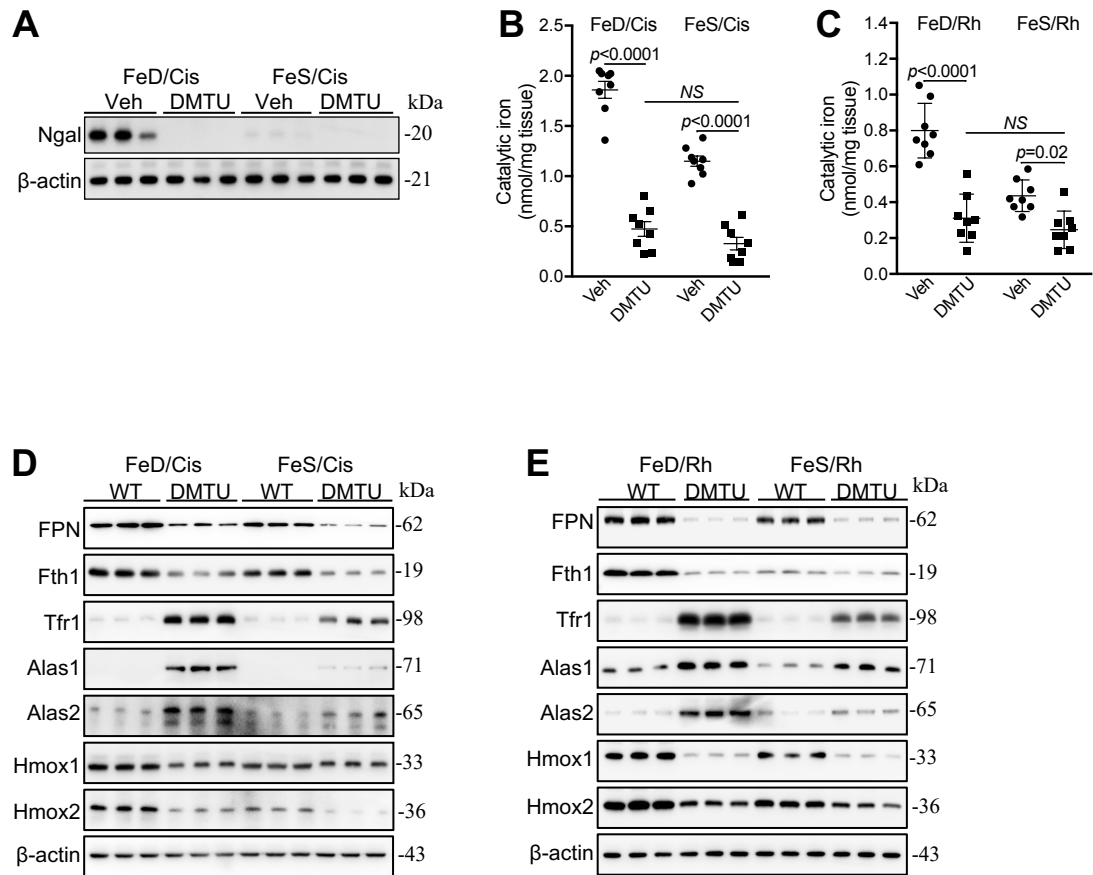



# Supplemental Fig. S5

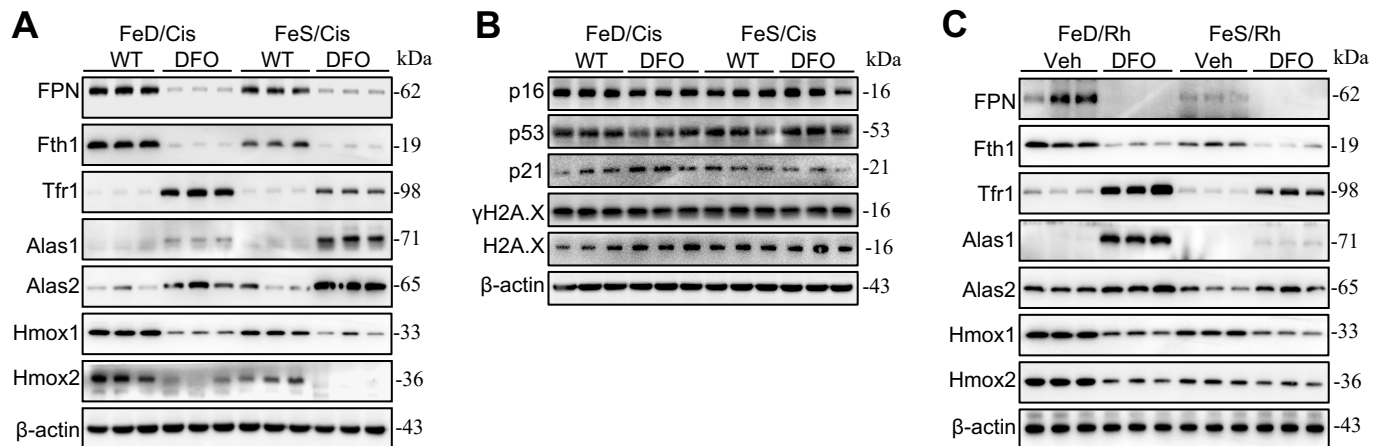

# Supplemental Fig. S6

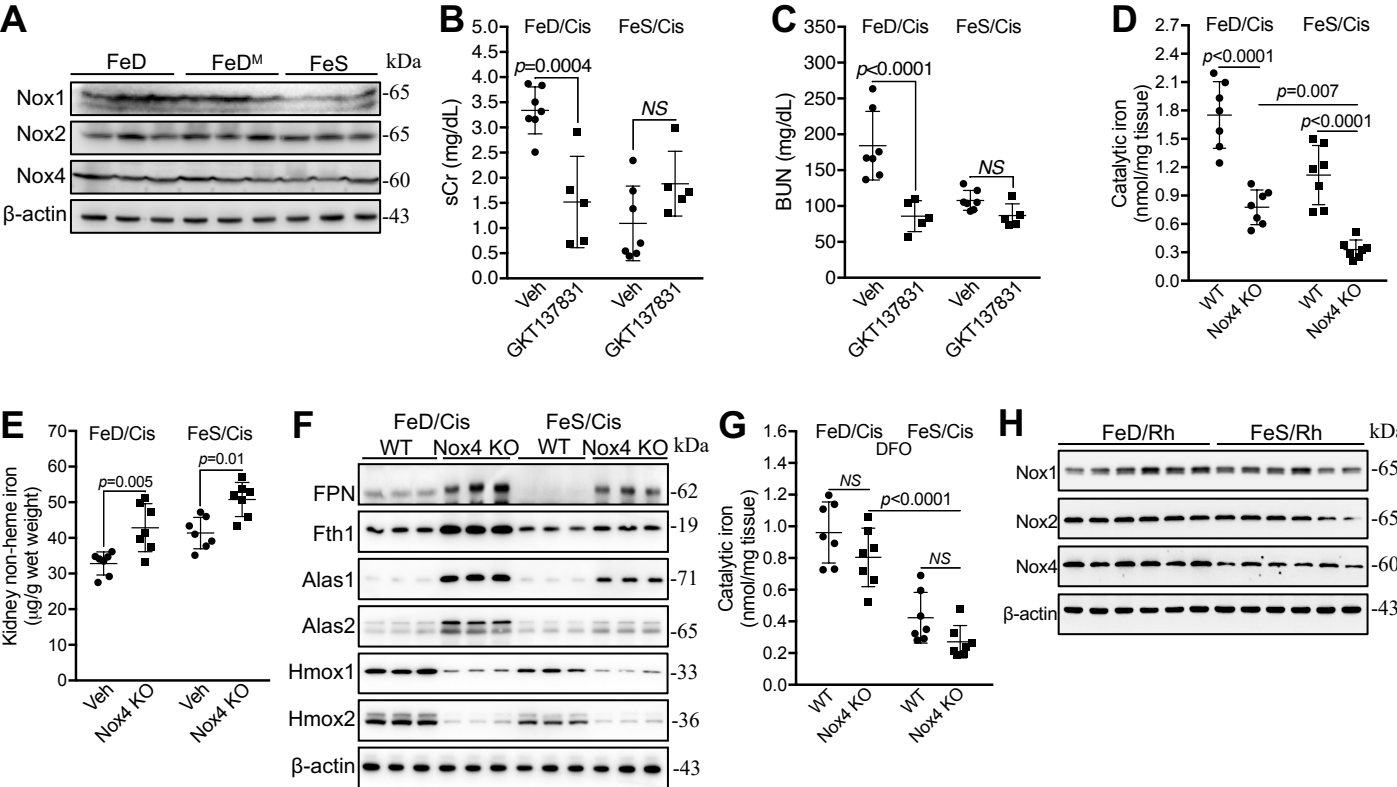

# Supplemental Fig. S7

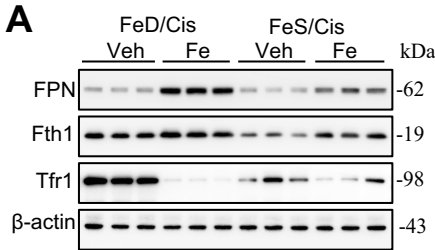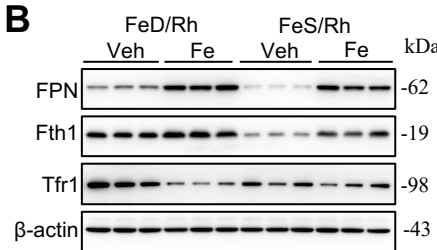

Supplement: NIHMS1832187-supplement-supplemental_files.pdf [file NIHMS1832187-supplement-supplemental_files.pdf]
